# Supplementary material for: Use of intercellular proximity labeling to quantify and decipher cell-cell interactions directed by diversified molecular pairs
Source: PubMed Central journal article supplement — Sci Adv. 2022 Dec 21;8(51):eadd2337. doi: 10.1126/sciadv.add2337 (PMC9770995; doi:10.1126/sciadv.add2337), 2022-12-21

Supplementary Materials for  
**Use of intercellular proximity labeling to quantify and decipher cell-cell interactions directed by diversified molecular pairs**

Shuang Qiu *et al.*

Corresponding author: Peng Wu, pengwu@scripps.edu; Jie P. Li, jieli@nju.edu.cn

*Sci. Adv.* **8**, eadd2337 (2022)  
DOI: 10.1126/sciadv.add2337

**This PDF file includes:**

Figs. S1 to S15  
Table S1  
Supplementary Methods

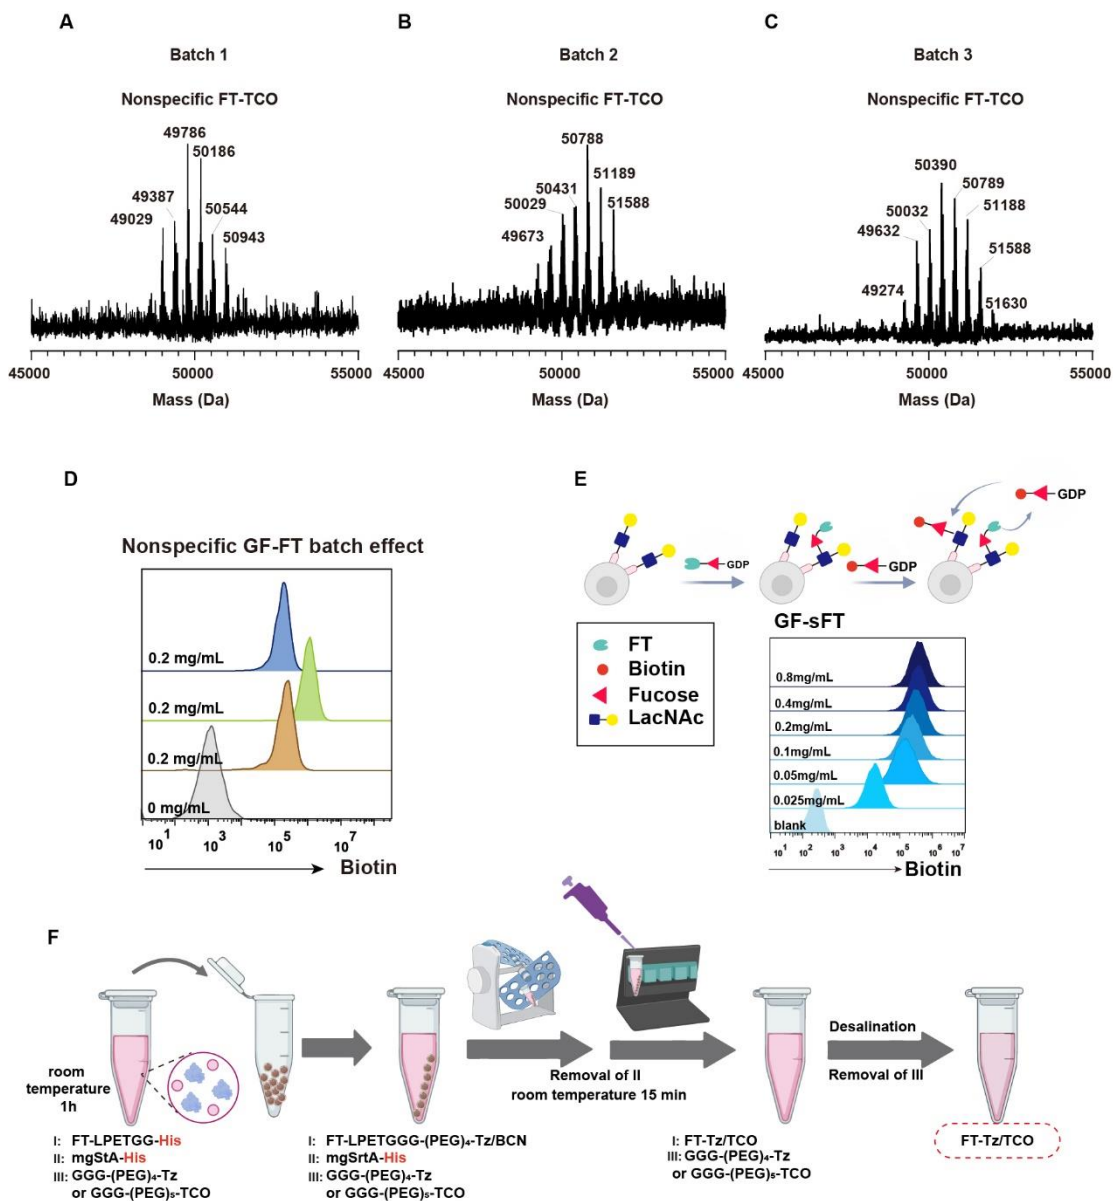

**Fig. S1 The batch effects of GF-FT constructed by non-specific conjugation.** Characterization of the batch effect of GF-FT by mass spectrum (A-C) and flow cytometry (D) (E) Self-Fucosyl-biotinylation of NK92 cells by cell-surface anchored FT. NK92 cells were first incubated under different concentrations of GF-sFT to install FT on cell surface, followed by wash and incubation with GF-Biotin. (F) The synthesis procedure of sFT.

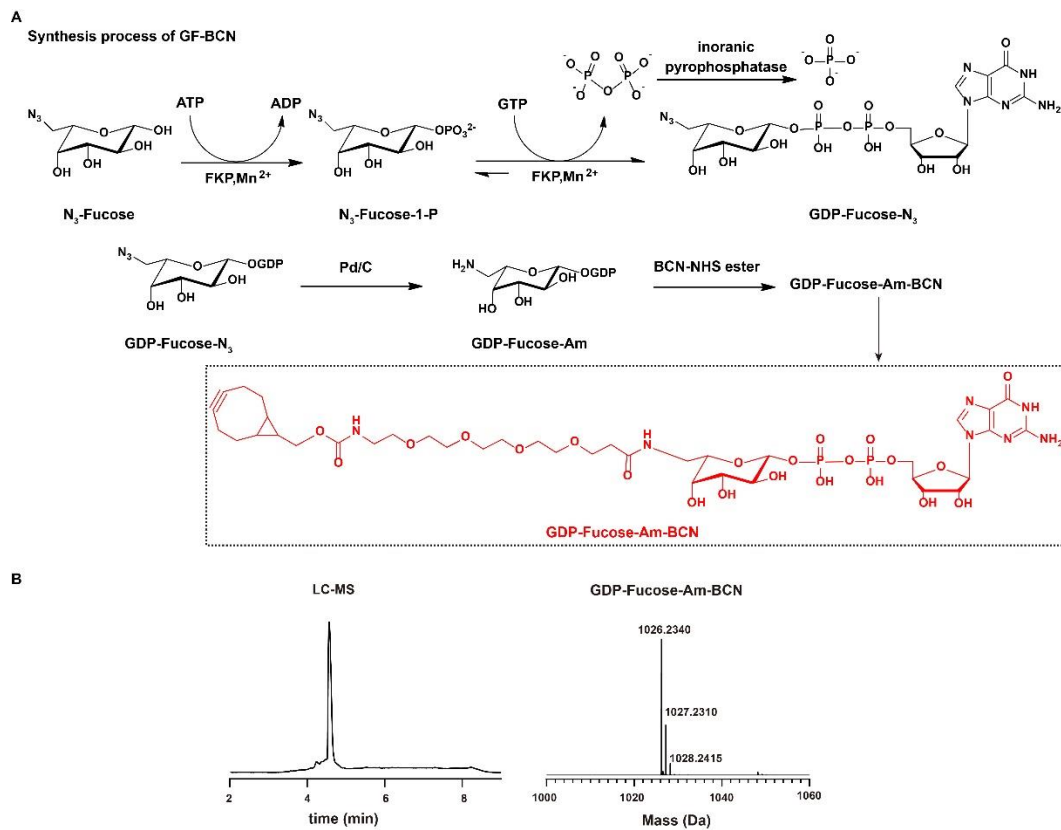

**Fig. S2 Synthesis and characterization of GF-BCN.**

(A) Synthesis procedure of GF-BCN. (B) Characterization of GF-BCN by mass spectrum.

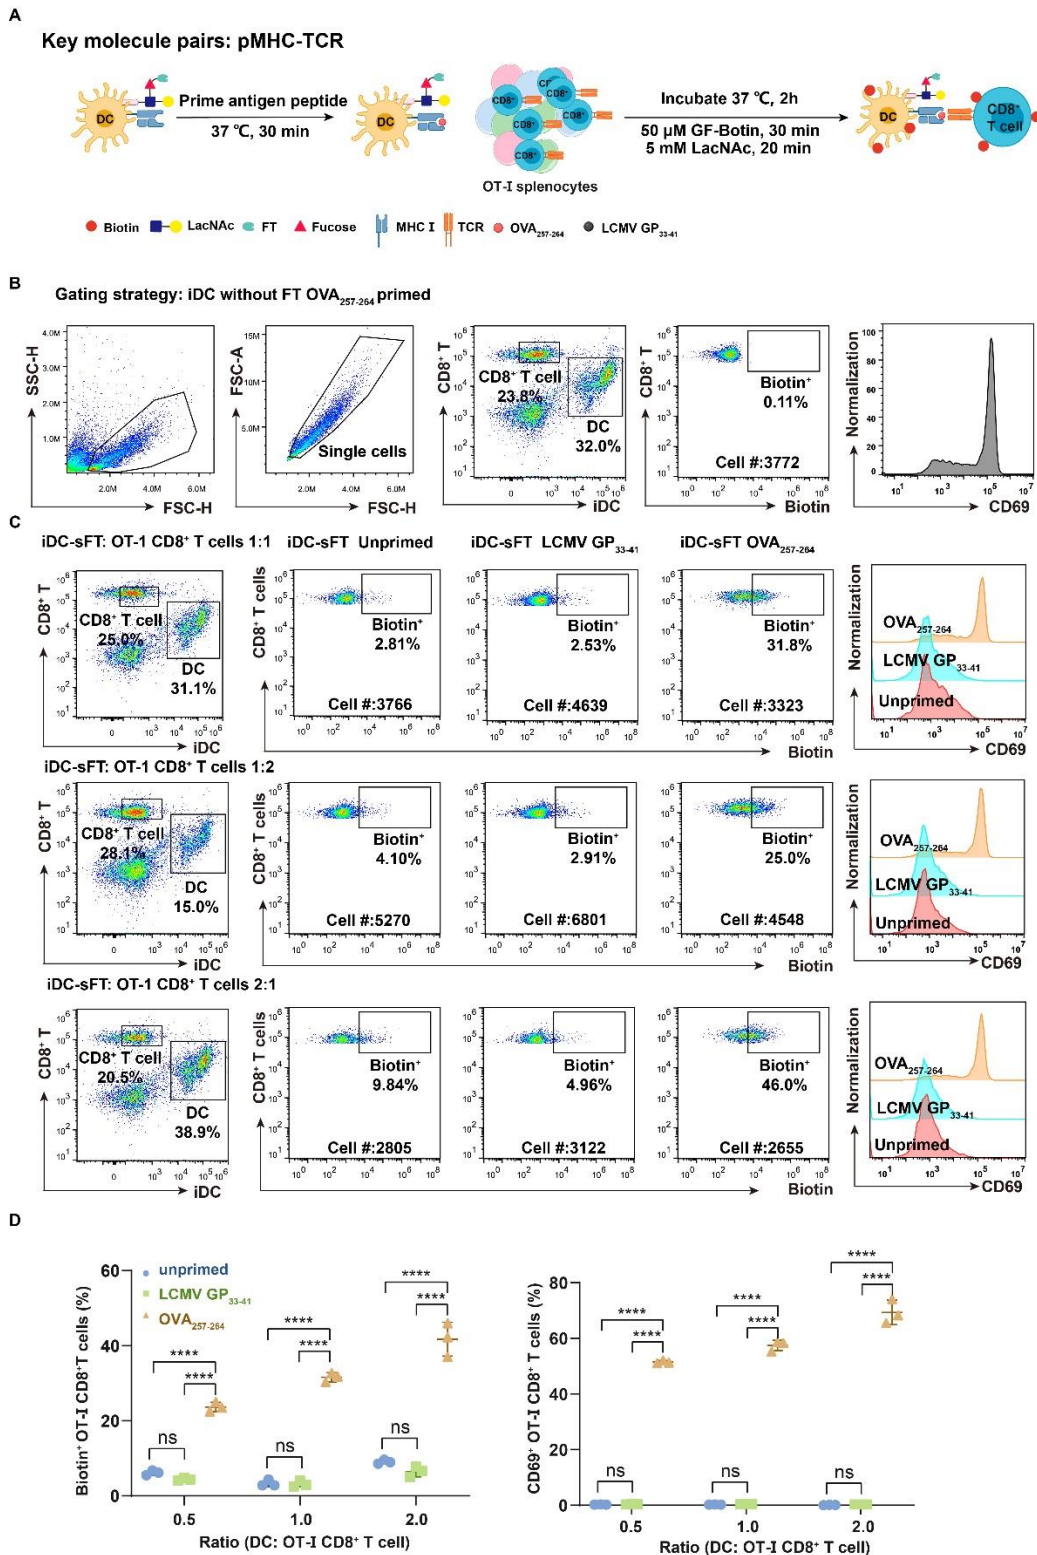

**Fig. S3 Detection of MHC-antigen-TCR mediated interactions via iDC-sFT.** (A) Workflow for probing MHC-antigen-TCR mediated interactions via iDC-sFT. (B) Gating strategy and representative flow cytometric plots showing the background of Fuc-Bio labeling (using iDC without FT as bait cell). (C) Flow cytometric plots and (D) statistics analysis showing antigen-specific biotinylation and CD69 activation of OT-I CD8<sup>+</sup> T cells under different ratios of bait cells versus prey cells. iDC: T cell ratio = 1: 1; 1: 2; 2: 1, n = 3. (ns p > 0.05; \*p < 0.05; \*\*p < 0.05; \*\*\*\*p < 0.001; \*\*\*\*\*p < 0.0001.)

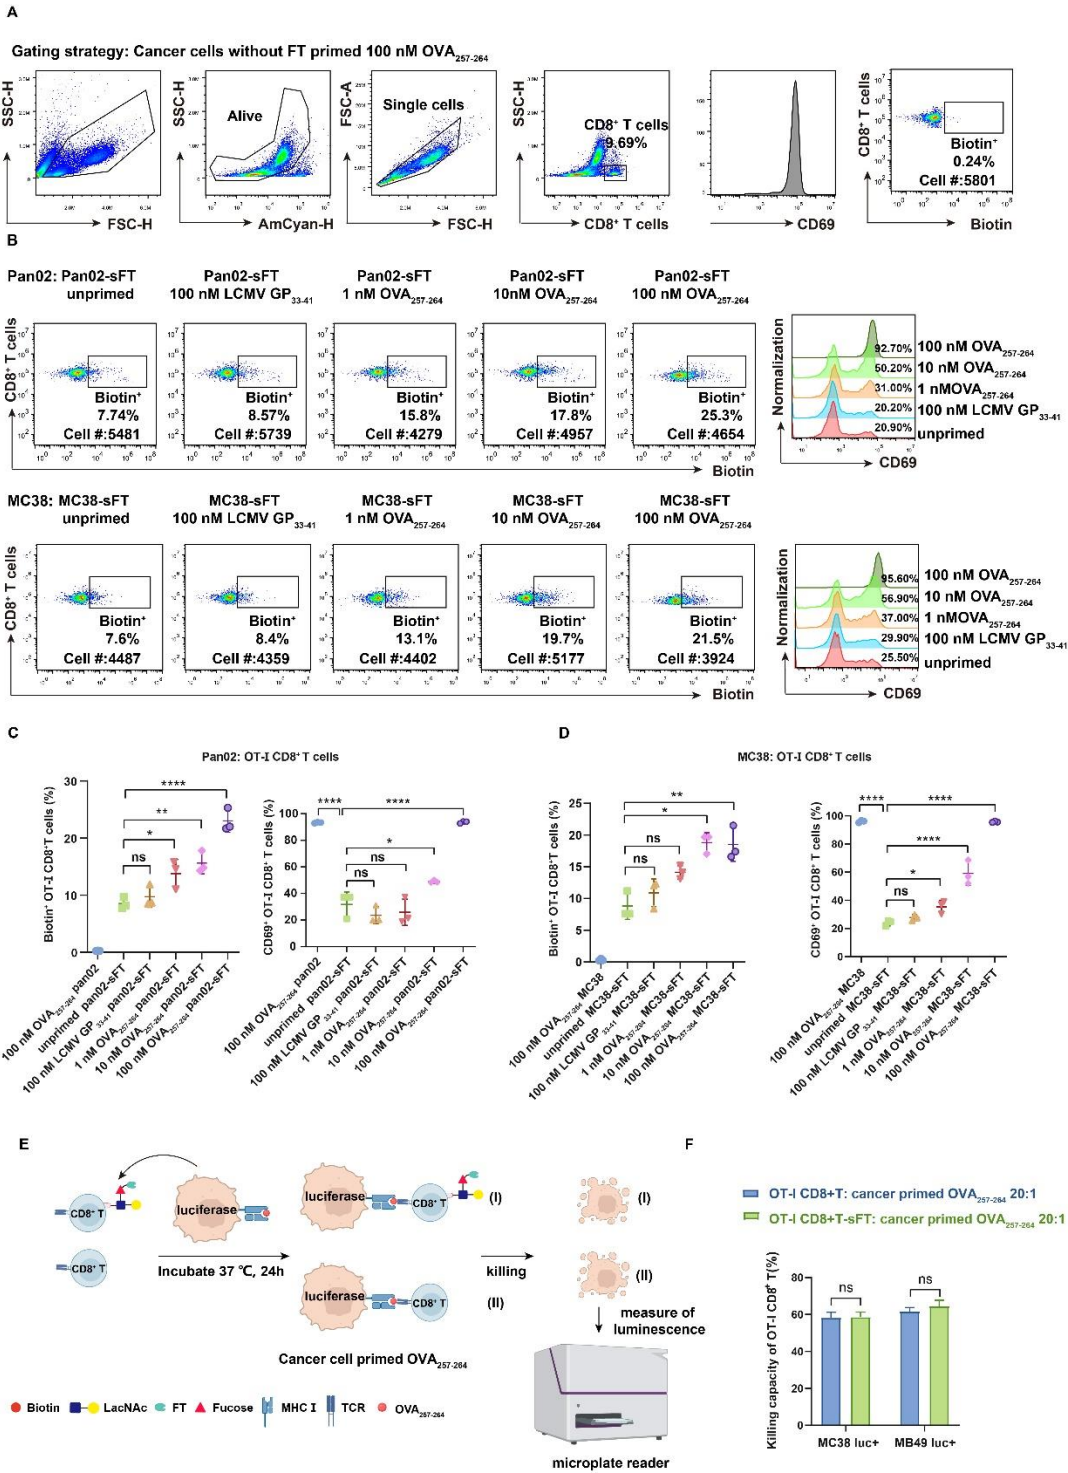

**Fig. S4 Detection of MHC-antigen-TCR mediated interactions via cancer cell-sFT.** (A) Gating strategy and representative flow cytometric plots showing background of Fuc-Bio labeling (using cancer cell without FT as bait cell). Flow cytometric plots (B) and statistics analysis (C-D) showing antigen-specific biotinylation and CD69 activation of OT-I CD8<sup>+</sup> T cells under different concentrations of OVA<sub>257-264</sub>. (1 nM, 10 nM, 100 nM) Pan02 or MC38: T cell ratio = 1: 1, n = 3. (E) Schematic illustration of characterizing the killing ability of OT-I CD8<sup>+</sup> T cells against cancer cells pulsed with specific antigen. (F) Statistics showing of killing capacity of unlabeled and labeled OT-I CD8<sup>+</sup> T cells. (ns p > 0.05; \*p < 0.05; \*\*p < 0.05; \*\*\*p < 0.001; \*\*\*\*p < 0.0001.)



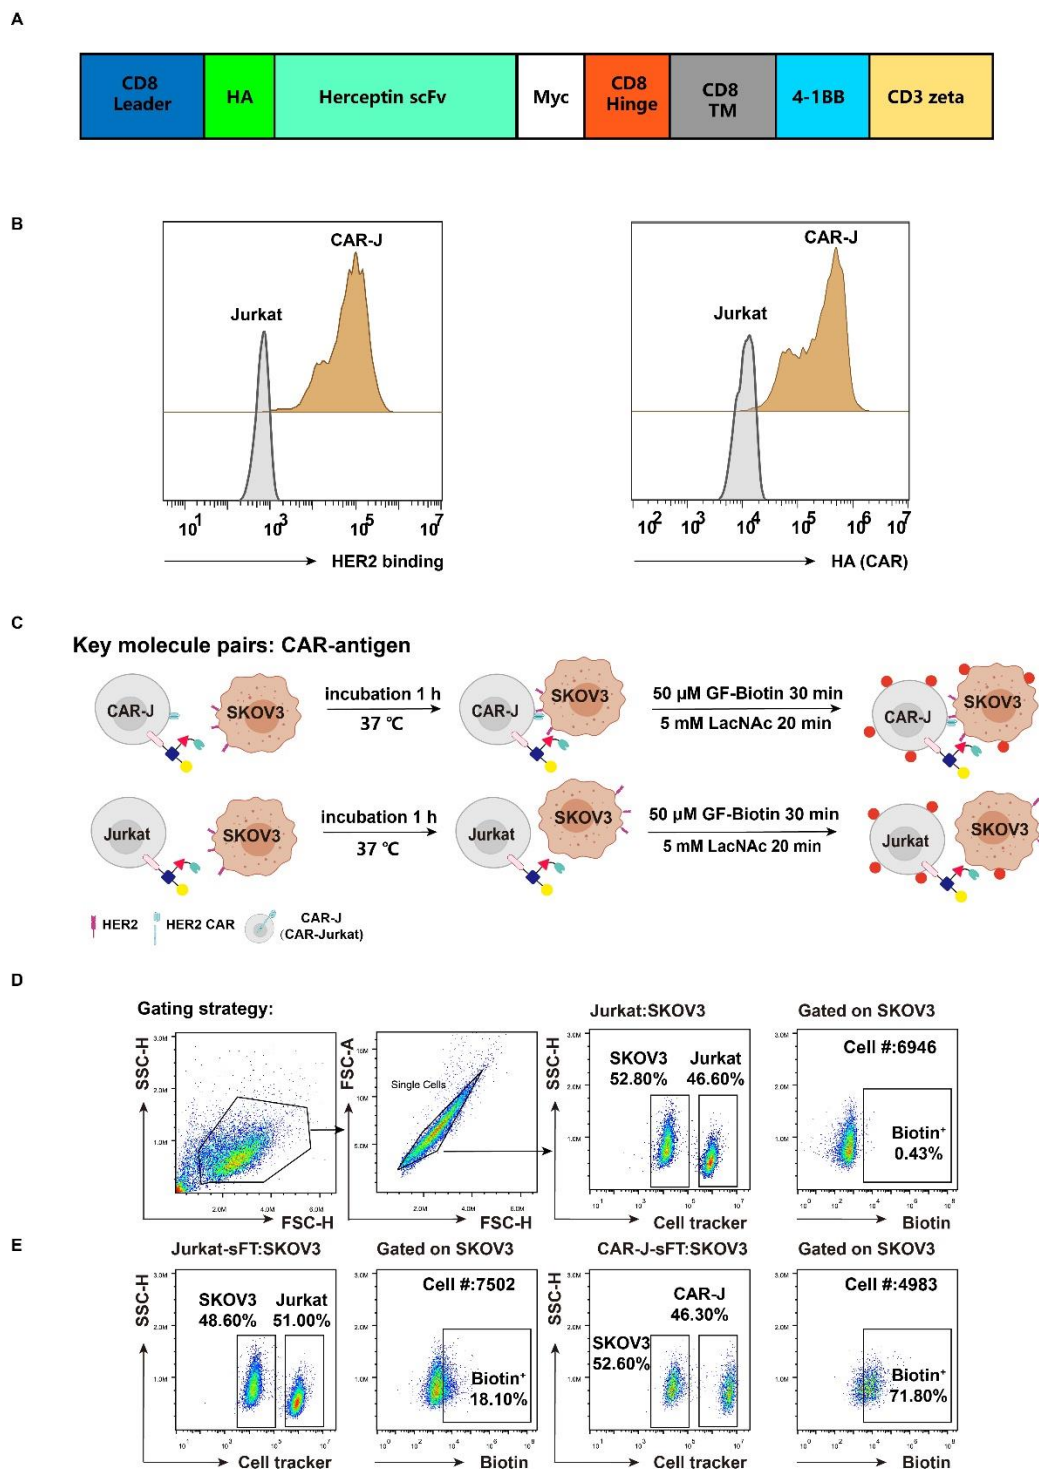

**Fig. S5 Detection of CAR-antigen mediated interactions via Jurkat-sFT or CAR-J-sFT**  
 (A) Schematic of CAR design. (B) Flow cytometric analysis of binding ability of CAR-J to HER2 and expression level of CAR on CAR-J. (C) Schematic workflow of detecting interactions between Jurkat/CAR-J and SKOV3 via Jurkat-sFT and CAR-J-sFT. (D) Gating strategy and representative flow cytometric plots showing the background of Fuc-Bio labeling (using Jurkat without FT as bait cell). (E) Representative flow cytometric plots showing biotinylation of SKOV3 using Jurkat-sFT and CAR-J-sFT. Jurkat/CAR-J: SKOV3 ratio = 1:1, n = 3. (ns  $p > 0.05$ ; \* $p < 0.05$ ; \*\* $p < 0.05$ ; \*\*\*\* $p < 0.001$ ; \*\*\*\*\* $p < 0.0001$ .)

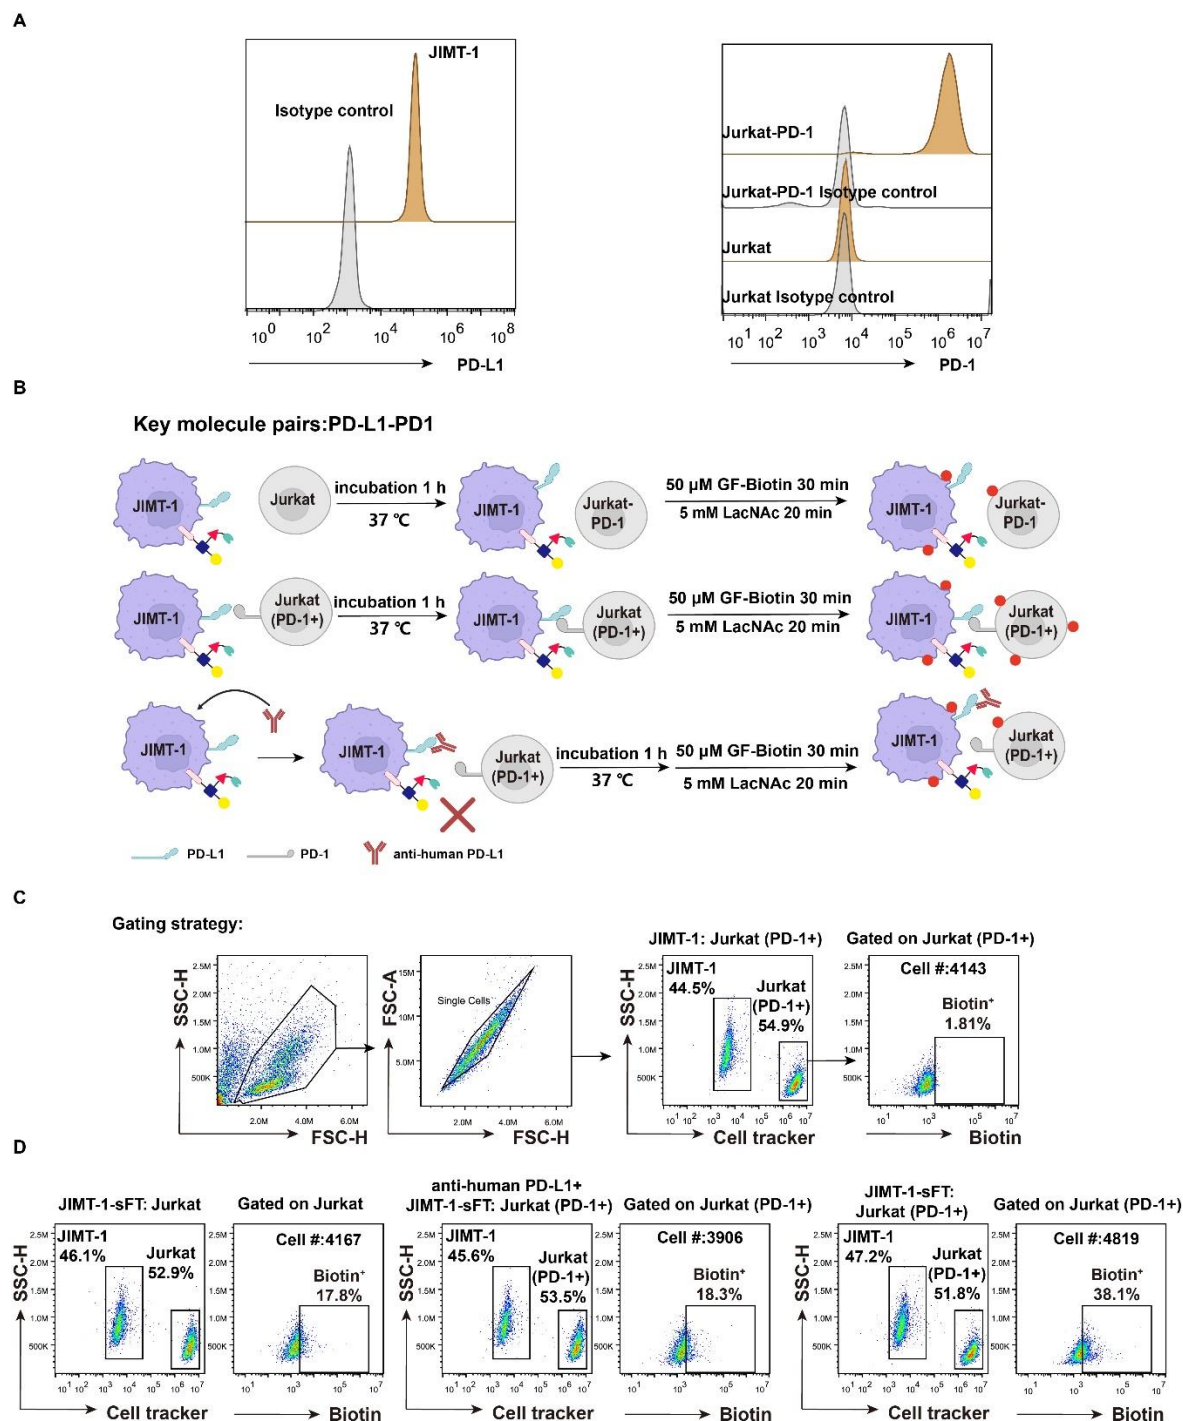

**Fig. S6 Detection of PD-1-PD-L1 mediated interactions via JIMT-1-sFT.** (A) Flow cytometric analysis of PD-L1 expression level on JIMT-1 and PD-1 expression level on Jurkat (PD-1+) and Jurkat. (B) Schematic workflow of detection interactions between Jurkat (PD-1+) /Jurkat and JIMT-1 via JIMT-1-sFT or JIMT-1-sFT pretreated by anti-human PD-L1. (C) Gating strategy and representative flow cytometric plots showing the background of Fuc-Bio labeling (using JIMT-1 without FT as bait cell). (D) Representative flow cytometric plots showing biotinylation of Jurkat (PD-1+) and Jurkat using JIMT-1-sFT or pretreated JIMT-1-sFT as bait cell. JIMT-1: Jurkat (PD-1+) ratio=1:1, n=3. (ns  $p > 0.05$ ; \* $p < 0.05$ ; \*\* $p < 0.05$ ; \*\*\* $p < 0.001$ ; \*\*\*\* $p < 0.0001$ .)





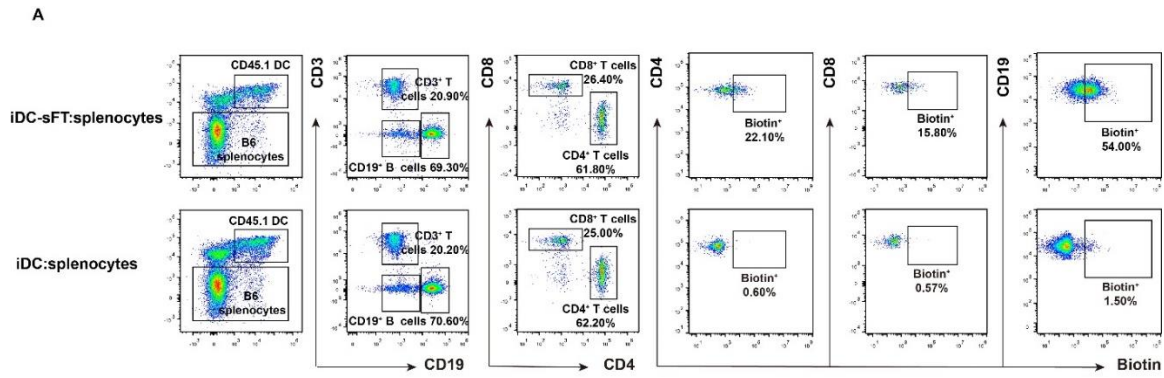

**Fig. S8 Gating strategy for studying the interactions of iDC and splenocytes.** (A) Gating strategy and representative flow cytometric plots showing biotinylation of immune cells in splenocytes. The background is defined as the signal produced on CD4<sup>+</sup> T cells, CD8<sup>+</sup> T cells and B cells by iDC without membrane-anchored sFT.

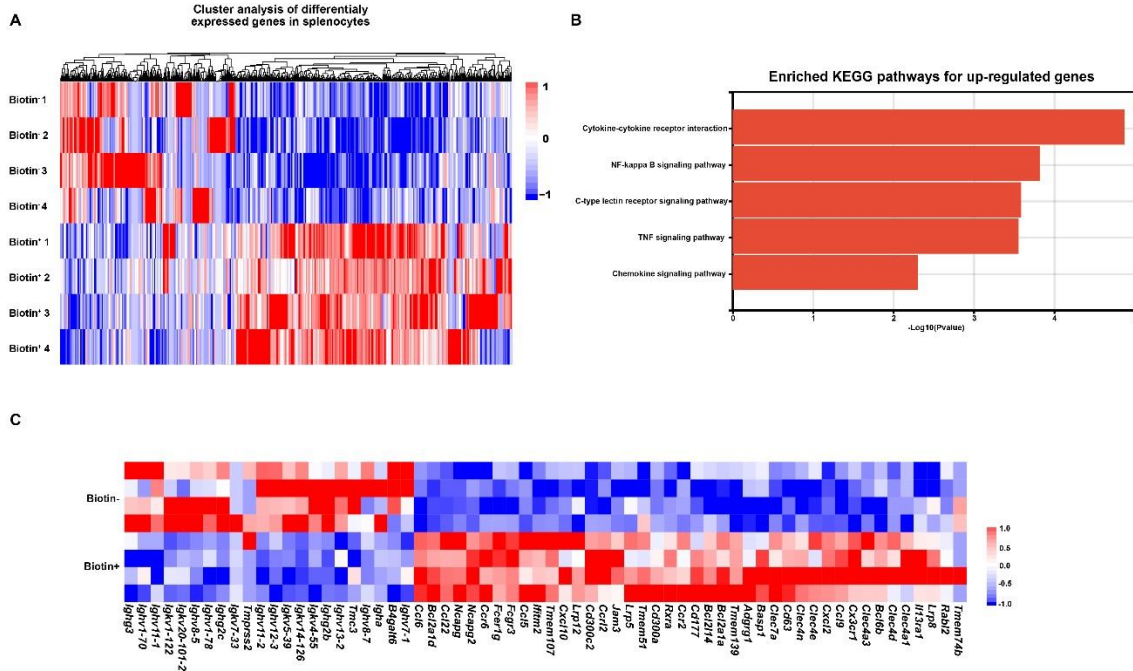

**Fig. S9 Bioinformatic analysis of the distinct gene signatures of B cells interacting with iDC.** (A) Cluster analysis of significantly differentially expressed genes between Biotin<sup>+</sup> and Biotin<sup>-</sup> B cells in splenocytes. (B) KEGG pathway enriched by the upregulated genes. Bar represents the P-value, n = 4. (C) Heatmap of differentially expressed genes between Biotin<sup>+</sup> and Biotin<sup>-</sup> B cells in splenocytes, n = 4. Focused on the gene set of membrane proteins.

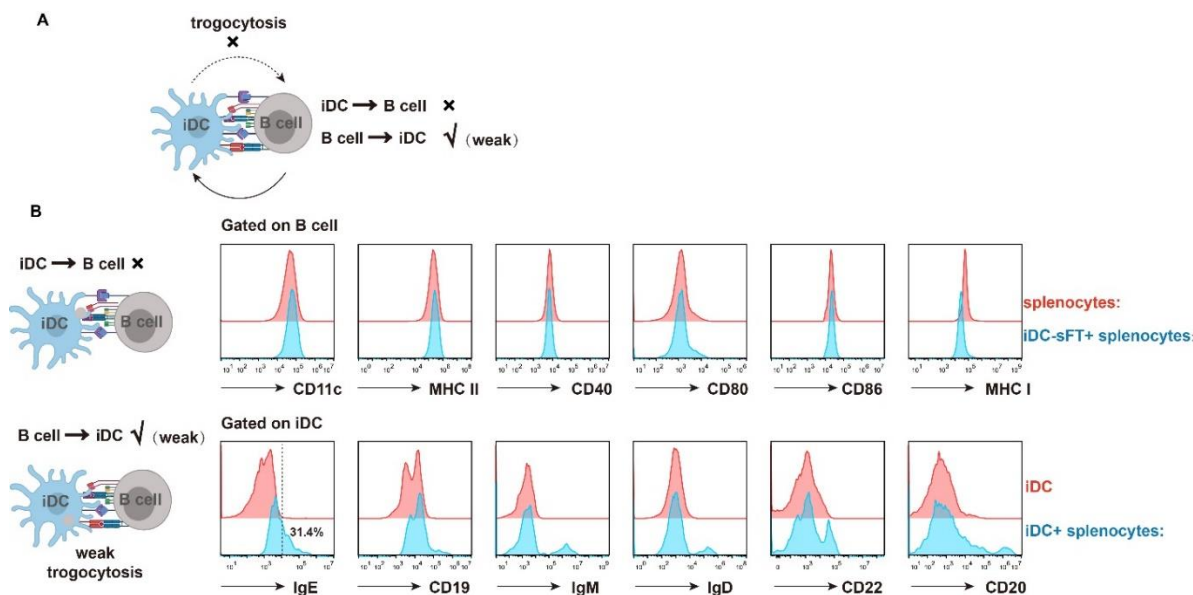

**Fig. S10 Analysis of the interactions between iDCs and B cells via trogocytosis.** (A) Schematic illustration of the interaction between iDCs and B cells revealed by the signal of trogocytosis. (B) Flow cytometric histograms showing of signal of trogocytosis appeared on cell surfaces. CD11c, MHC II, CD40, CD80, CD86 and MHC I are cell surface markers of DC, while IgE, IgM, IgD, CD19, CD22 and CD20 are cell surface markers of B cells.

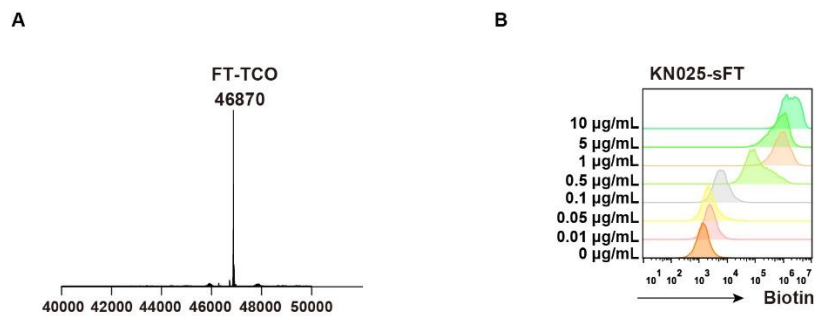

**Fig. S11 Characterization of activity of KN025-sFT.** (A) Characterization of site-specific FT-TCO by mass spectrum. (B) Characterization of activity of KN025-sFT by Fuc-Bio labeling on SKOV3.

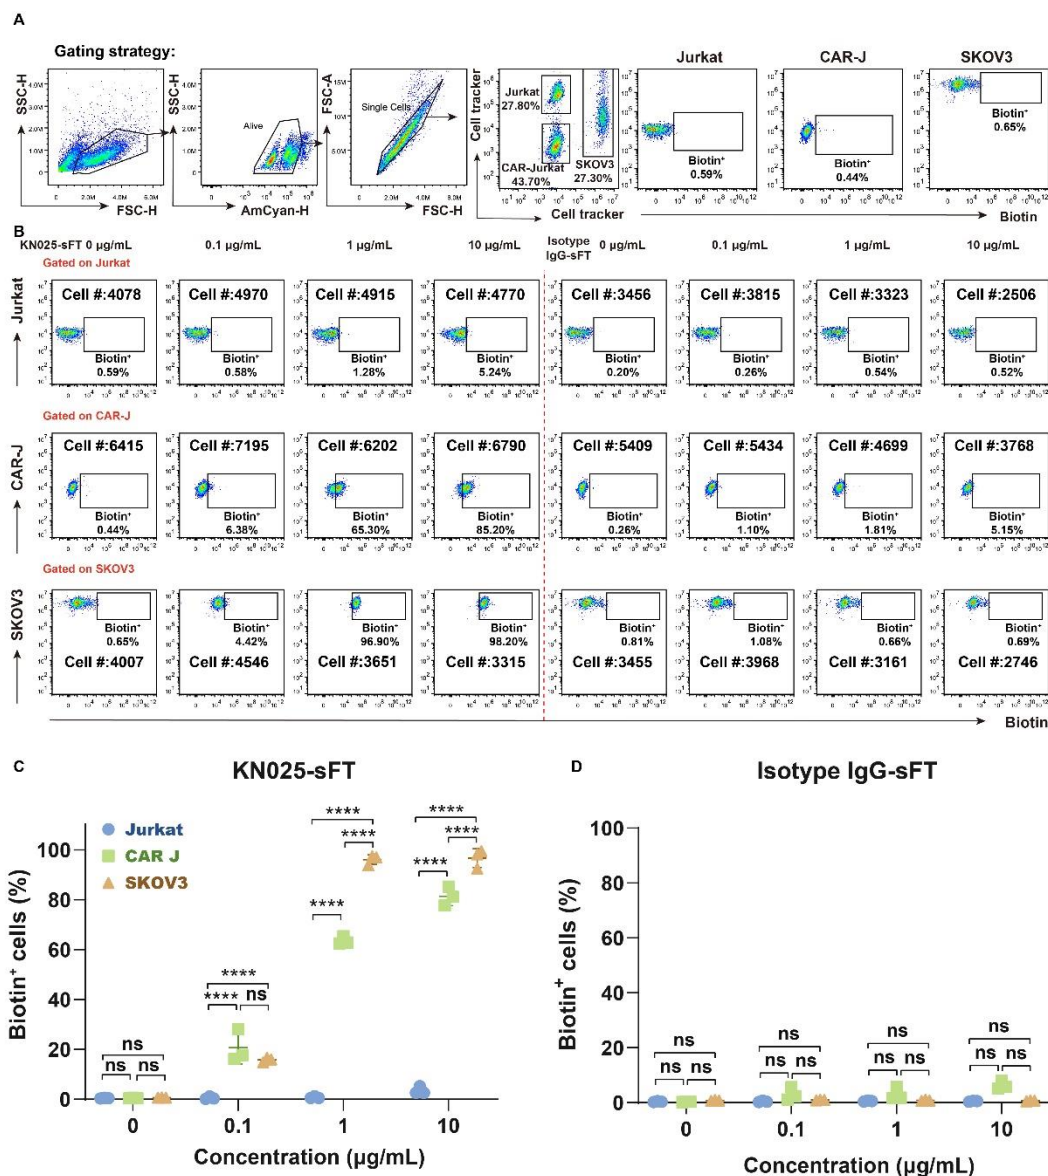

**Fig. S12 Detection of interactions between Jurkat or CAR-J and SKOV3 via KN025-sFT.** (A) Gating strategy and representative flow cytometric plots showing the background of Fuc-Bio labeling by without adding KN025-sFT. (B) Representative flow cytometric plots showing biotinylation of Jurkat, CAR-J and SKOV3 under different concentrations of KN025-sFT and Isotype IgG-sFT. (C) (D) Summary statistics of the interaction dependent Fuc-Bio of SKOV3, Jurkat and CAR-J in cell mixtures via KN025-sFT and Isotype IgG-sFT,  $n = 3$ . (ns  $p > 0.05$ ; \* $p < 0.05$ ; \*\* $p < 0.05$ ; \*\*\*\* $p < 0.001$ ; \*\*\*\*\* $p < 0.0001$ .)

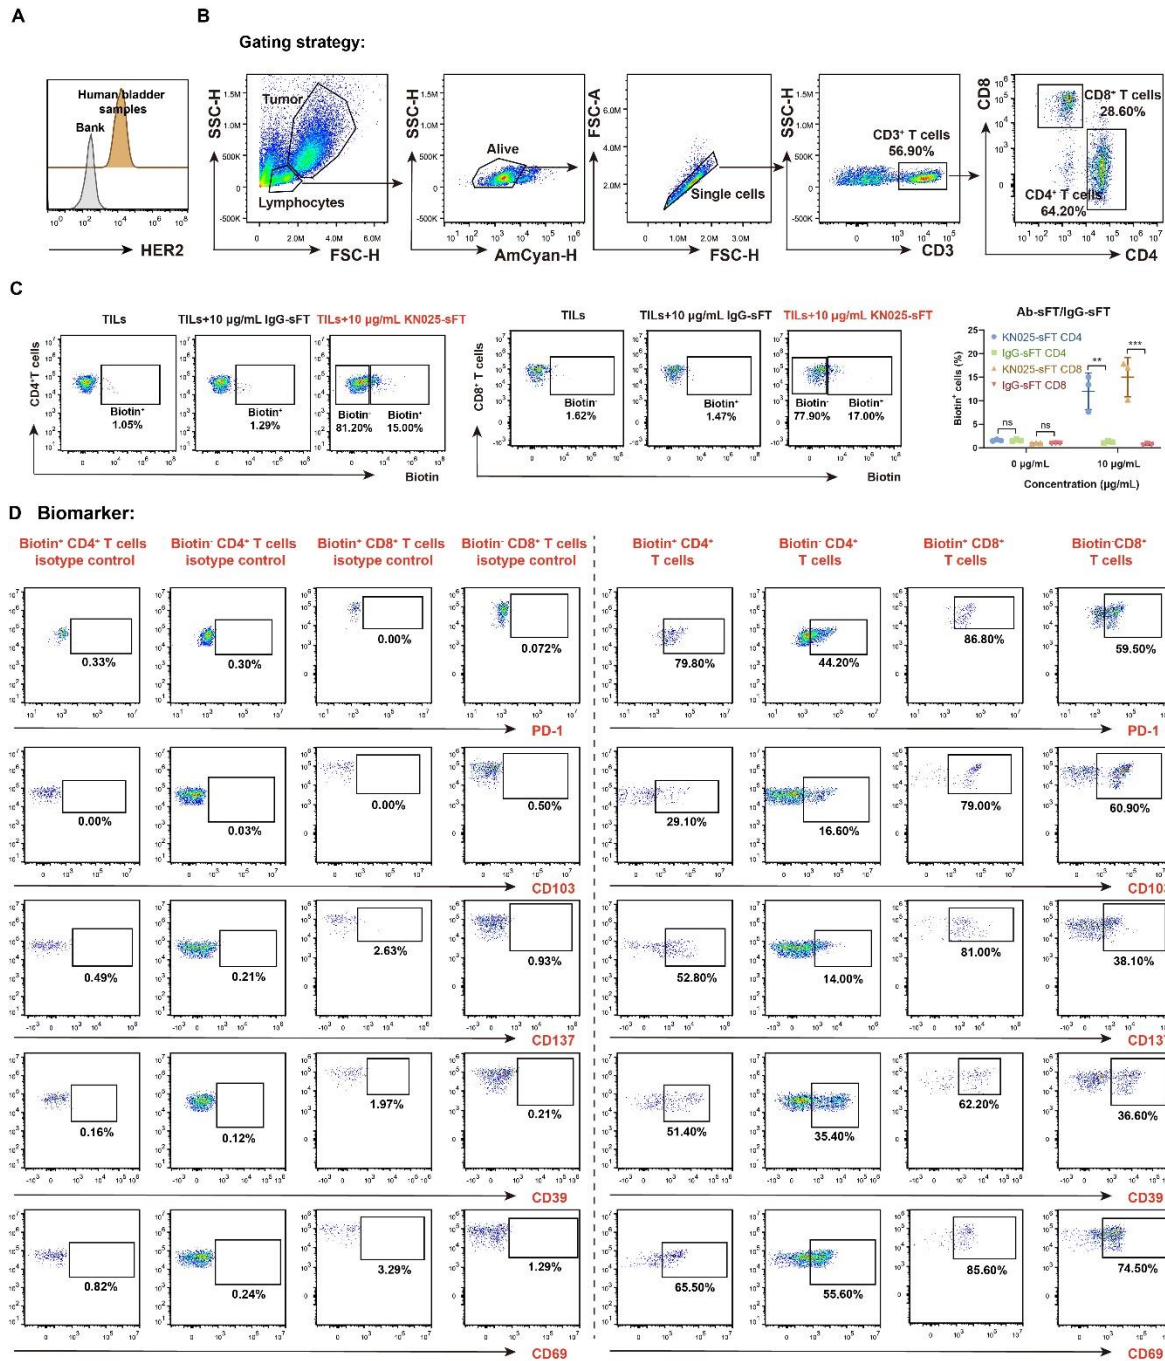

**Fig. S13 Detection of interactions between cancer cells (HER2<sup>+</sup>) and T cells in human bladder samples.** (A) Flow cytometric characterization of HER2 expression level on human bladder cancer cells. (B) Representative flow cytometric plots showing the gating strategy for Fuc-Bio proportion of CD4<sup>+</sup> T cells and CD8<sup>+</sup> T cells in human bladder samples via KN025-sFT. (C) Flow cytometric analysis and summary statistics of the interaction dependent Fuc-Bio of CD4<sup>+</sup> T cells and CD8<sup>+</sup> T cells in human bladder samples via KN025-sFT and isotype IgG-sFT, n = 3. The background signal is defined as the signal produced on CD4<sup>+</sup> T cells and CD8<sup>+</sup> T cells by without adding KN025-sFT. (D) Flow cytometric plots showing the expression ratio of PD-1, CD103, CD137, CD39 and CD69 on Biotin<sup>+</sup> CD4<sup>+</sup> T cells, Biotin<sup>-</sup> CD4<sup>+</sup> T cells, Biotin<sup>+</sup> CD8<sup>+</sup> T cells and Biotin<sup>-</sup> CD8<sup>+</sup> T cells. The background signal is defined by Biotin<sup>+</sup> CD4<sup>+</sup> T cells, Biotin<sup>-</sup> CD4<sup>+</sup> T cells, Biotin<sup>+</sup> CD8<sup>+</sup> T cells and Biotin<sup>-</sup> CD8<sup>+</sup> T cells unstained for biomarkers. (ns p > 0.05; \*p < 0.05; \*\*p < 0.05; \*\*\*p < 0.001; \*\*\*\*p < 0.0001.)



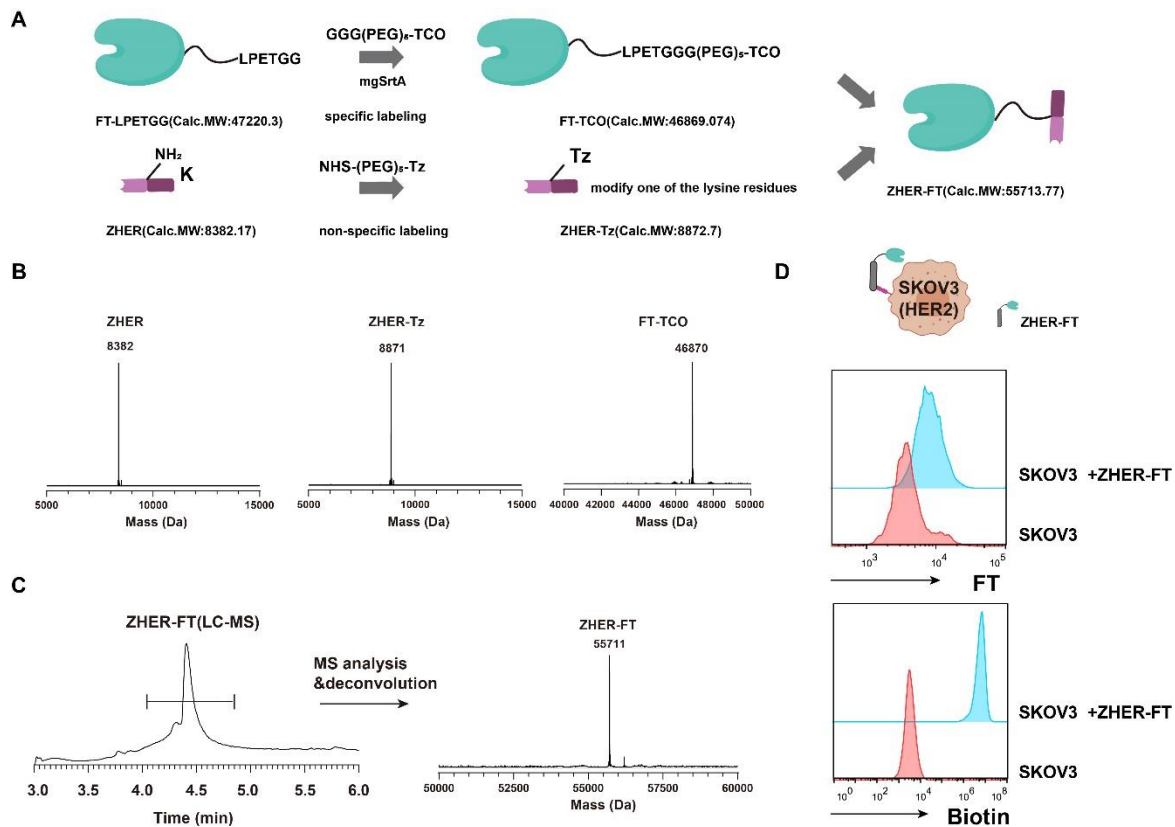

**Fig. S14 Characterization of Nanobody-FT.** (A) Schematic illustration of ZHER-FT construction. Calculated MWs of different parts are shown. (B) Characterization of ZHER, ZHER-Tz and FT-TCO by mass spectrum analysis. (C) Characterization of the ZHER-FT conjugate by LC-MS. Shown are detected MWs in B and C. (D) Characterization of the binding ability of ZHER-FT by anti-FT antibody and the activity of ZHER-FT on SKOV3 cells that triggers biotinylation on cell surface via GF-Biotin. Briefly, ZHER-FT was synthesized via the IEDDA mediated chemical ligation (see Supplementary Methods). SKOV3 cells were treated with ZHER-FT, which the binding of ZHER-FT on SKOV3 cells was confirmed by the anti-FT antibody. After that, SKOV3- ZHER-FT was incubated with 50  $\mu$ M GF-Biotin to initiate the proximity labeling, which was confirmed by flow cytometry analysis after APC-SA (Streptavidin) staining.

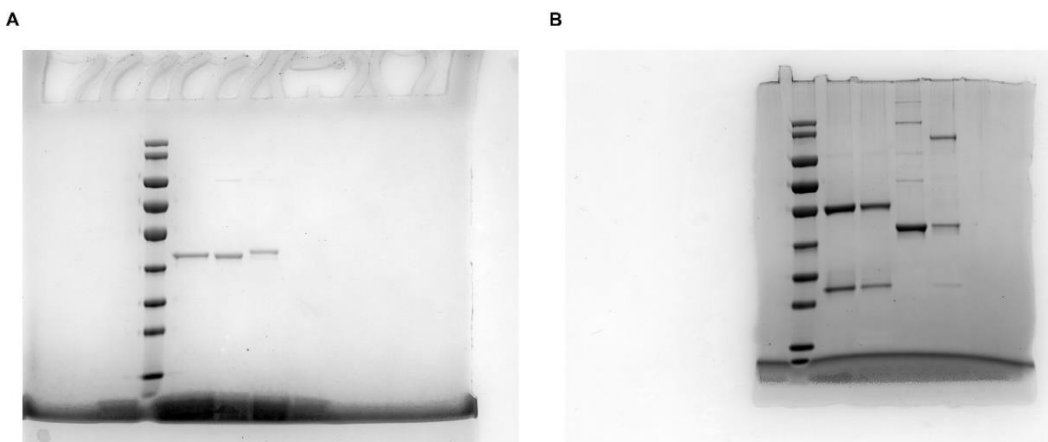

**Fig. S15 High resolution non-cropped images of Coomassie gel.**



**Table S1.**

| Plasmid name             | Protein sequence                                                                                                                                                                                                                                                                                                                                                                                                                                                                                                                                                                                                                                                                                                                                                                                      |
|--------------------------|-------------------------------------------------------------------------------------------------------------------------------------------------------------------------------------------------------------------------------------------------------------------------------------------------------------------------------------------------------------------------------------------------------------------------------------------------------------------------------------------------------------------------------------------------------------------------------------------------------------------------------------------------------------------------------------------------------------------------------------------------------------------------------------------------------|
| FT-LPETGG on pET-28a (+) | MFQPLLDAFIESASIEKMVSKSPPPPLKIAVANWWGDEEIKEFKKSVLYFILS<br>QRYAITLHQNPNESSDLVFSNPLGAARKILSYQNTKRVFYTGENESPNFNLF<br>DYAIGFDELDFNDRYLRMPLYAHLHYEAELVNDTTAPYKLDNSLYALK<br>KPSHHFKENHPNLSAVVNDESLLKRGFASFVASNANAPMRNAFYDALNSI<br>EPVTGGGSRVNTLGYKVGKSEFLSQYKFNLCFENSQGYGYVTEKILDAYF<br>SHTIPIYWGSPSVAKDFNPKSFVNVHDFNNFDEAIDYIKYLHTHPNAYLDM<br>YENPLNTLDGKAYFYQDLSFKKILDFFKTILENDTIYHNNPFIFYRDLHEPLIS<br>IDDLRVNYDDLRVNYDDLRVNYDDLRVNYLE <b>LPETGG</b> HHHHHHH*                                                                                                                                                                                                                                                                                                                                              |
| Herceptin 4D5 on pLenti  | <b>MALPVTALLLPLALLLHAARP</b> (CD8leader) <b>YPYDVPDYA</b> (HAtag)<br><b>GSDIQMTQSPSSLSASVGDRTITCRASQDVNTAVAWYQQKPGKAPKLL</b><br><b>IYSASFLYSGVPSRFSGSRSGTDFTLTISSLPEDFATYYCQGHYTPPTF</b><br><b>GQGTKVEIKRT</b> (VL)<br>GGGSGGGSGGGSGGGGSEVQLVESGGGLVQPGGSLRLSCAASGFNI<br>KDTYIHVWRQAPGKGLEWVARIYPTNGYTRYADSVKGRFTISADTSKN<br>TAYLQMNSLRAEDTAVYYCSRWGGDGFYAMDYWGQGLTVTVSS (VH)<br><b>GSEQKLISEEDL</b> (Myc)<br><b>FVPVFLPAKPTTTPAPRPPTPAPTIASQPLSLRPEACRPAAGGAVHTRGL</b><br><b>DFACDIYWAPLAGTCGVLLLSLVITLYCNHRN</b> (human CD8 alpha chain<br><b>1 extracellular domain)</b><br><b>KRGRKLLYIFKQPFMRPVQTTQEEDGCSCRFPEEEEGGCEL</b> (4-1BB)<br><b>RVKFSRSADAPAYKQGQNQLYNELNLGRREEYDVLDKRRGRDPEMGG</b><br><b>KPRRKNPQEGLYNELQKDKMAEAYSEIGMKGERRRGKGGHDGLYQGLS</b><br><b>TATKDTYDALHMQUALPPR</b> (CD3zeta)* |
| Human PD-1 on pLenti     | MQIPQAPWPVVWAVLQLGWRPGWFLDSPDRPWNPPTFSPALLVVTEGDNA<br>TFTCSFSNTSESFVLNWYRMSPSNQTDKLAAPEDRSQPGQDCFRFRVTQLPN<br>GRDFHMSVVRARRNDSGYLTCGAISLAPKAQIKESLRAELRVTERRAEVPT<br>AHPSPSPRPAGQFQTLVVGVGGLLGSLLVLLVWVLAVICSRAARGTIGARR<br>TGQPLKEDPSAVPVFSDYGELDFQWREKTPEPPVPCVPEQTEYATIVFPSG<br>MGTSSPARRGSADGPRSAQPLRPEDGHCSWPL                                                                                                                                                                                                                                                                                                                                                                                                                                                                                   |

## Supplementary Methods

### *Synthesis procedure of ZHER-FT conjugates (ZHER-FT).*

The Tz group was first introduced onto ZHER protein, which allows the production of ZHER-FT conjugates by a click reaction with FT-TCO. Briefly, a 50 mM stock of NHS-(PEG)<sub>4</sub>-Tz in DMSO was added to solution of ZHER (7.4 mg/mL, 200  $\mu$ L) at a final concentration of 5 mM. The solution was desalted into PBS by G25 desalting column to obtain 4 mg/mL ZHER-Tz. After that, 2 mg/mL FT-TCO was added to solution, (approximately 5 equiv. of ZHER-Tz) and incubated at room temperature for 5 min to obtain ZHER-FT.

### *Detection of the binding ability and activity of ZHER-FT.*

A total of 1 million SKOV3 were resuspended in 100  $\mu$ L HBSS buffer containing 20 mM MgSO<sub>4</sub>, 3 mM HEPES and 0.5% FBS. Cells were treated with 0.2 mg/mL ZHER-FT, after incubated on ice for 30 min, SKOV3-sFT was washed twice with PBS. SKOV3-sFT cells were divided into two parts, one part was incubated with 10  $\mu$ g/mL polyclonal FT antibody for 30 minutes on ice. After washing three times with PBS, PE anti-mouse IgG was used for flow cytometry to detect binding ability of ZHER-FT. The other part was added to 50  $\mu$ M GF-Biotin and reacted on ice for 20 minutes. After washing twice with PBS, APC-SA (Streptavidin) was used for flow cytometry to detect labeling activity of FT.

### *Luminescent cell viability assay*

10000 MC38 or MB49 cancer cells (stable luciferase expression) presented OVA<sub>257-264</sub> were seeded into 96-well plates, and 200000 OT-I CD8<sup>+</sup>T cells were added and incubated for 24 hours. CellTiter-Glo Reagent (Promega) was added after 24 h incubation. Luminescent signal was determined using Synergy 2 MultiMode Microplate Reader.

## Spectra

### *1. Synthesis of GDP-Fuc-AM -Biotin*

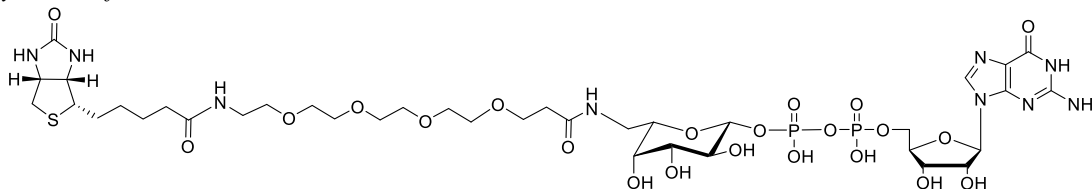

500  $\mu$ L GDP-Fuc-AM (100 mM in ddH<sub>2</sub>O) in 1.5 mL ddH<sub>2</sub>O were added with 500  $\mu$ L NaHCO<sub>3</sub> (200 mM), 1.95 mL THF and 550  $\mu$ L NHS-PEG<sub>4</sub>-Biotin (Click Chemistry Tools) (100 mM in THF). The reaction was stirred at r.t. for 4 h and monitored by TLC. The solvent was removed under reduced pressure. The crude product was further purified through a Prep-HPLC system to give the product as a white solid (20.5 mg, 38%). HRMS (ESI-) calcd for C<sub>37</sub>H<sub>61</sub>N<sub>9</sub>O<sub>22</sub>P<sub>2</sub>S (M-H<sup>+</sup>) 1076.3054, found 1076.3068. <sup>1</sup>H NMR (400 MHz, D<sub>2</sub>O)  $\delta$  8.13 (s, 1H), 5.93 (d, *J* = 6.1 Hz, 1H), 4.94 (t, *J* = 7.8 Hz, 1H), 4.80-4.78 (m, 1H), 4.59 (dd, *J* = 7.9, 4.6 Hz, 1H), 4.54 (dd, *J* = 5.2, 3.4 Hz, 1H), 4.40 (dd, *J* = 7.9, 4.4 Hz, 1H), 4.36-4.35 (m, 1H), 4.23 (dd, *J* = 5.4, 3.4 Hz, 2H), 3.88 (d, *J* = 3.1 Hz, 1H), 3.77 (t, *J* = 6.3 Hz, 2H), 3.69-3.67 (m, 14H), 3.64-3.62 (m, 3H), 3.6-3.58 (m, 1H), 3.39 (t, *J* = 5.3 Hz, 2H), 3.33-3.27 (m, 2H), 2.98 (dd, *J* = 13.1, 5.0 Hz, 1H), 2.78 (d, *J* = 13.0 Hz, 1H), 2.57 (t, *J* = 6.2 Hz, 2H), 2.27 (t, *J* = 7.3 Hz, 2H), 1.76-1.54 (m, 4H), 1.43-1.37 (m, 2H). <sup>13</sup>C NMR (101 MHz, D<sub>2</sub>O)  $\delta$  176.9, 174.2, 165.3, 158.8, 153.9, 151.8, 116.2, 98.5, 98.4, 86.8, 83.8, 83.7, 73.64, 73.55, 72.14, 71.16, 71.07, 70.44, 69.61, 69.58, 69.56, 69.53, 69.39, 68.98, 68.86, 66.75, 65.33, 65.28, 62.04, 60.23, 55.33, 40.0, 38.89, 35.70, 35.44, 27.87, 27.67, 25.12.

# Mass spectrometry

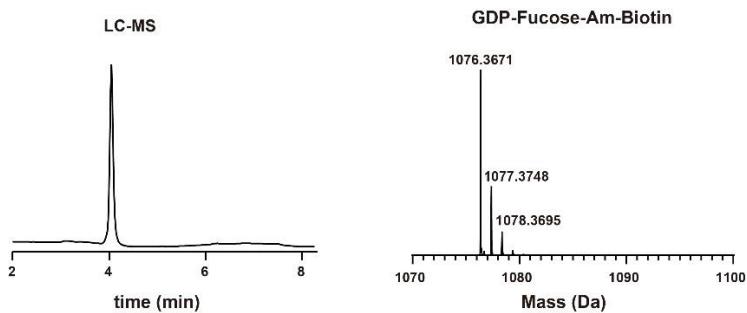

## $^1\text{H}$ NMR (400 MHz, $\text{D}_2\text{O}$ )

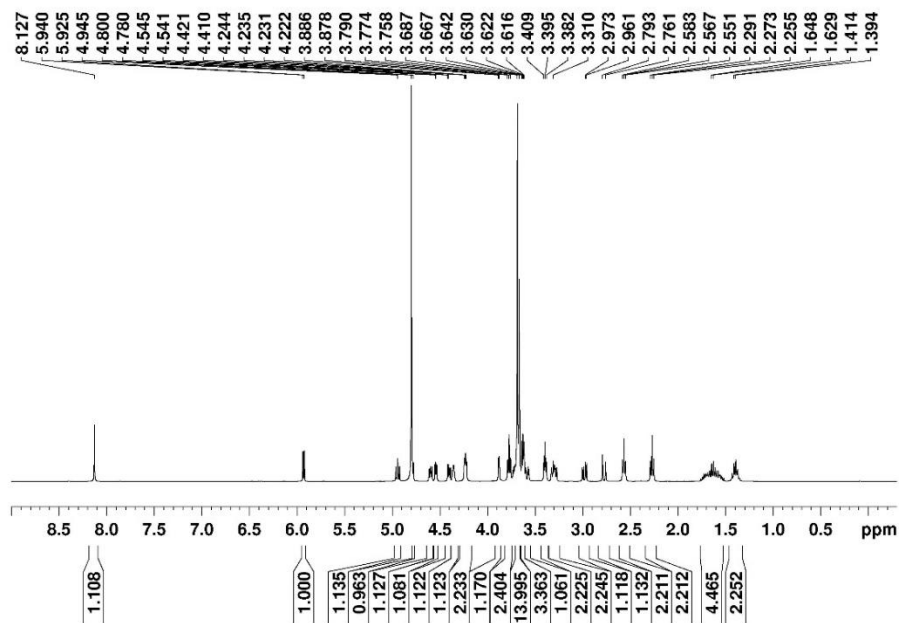

## $^{13}\text{C}$ NMR (101 MHz, $\text{D}_2\text{O}$ )

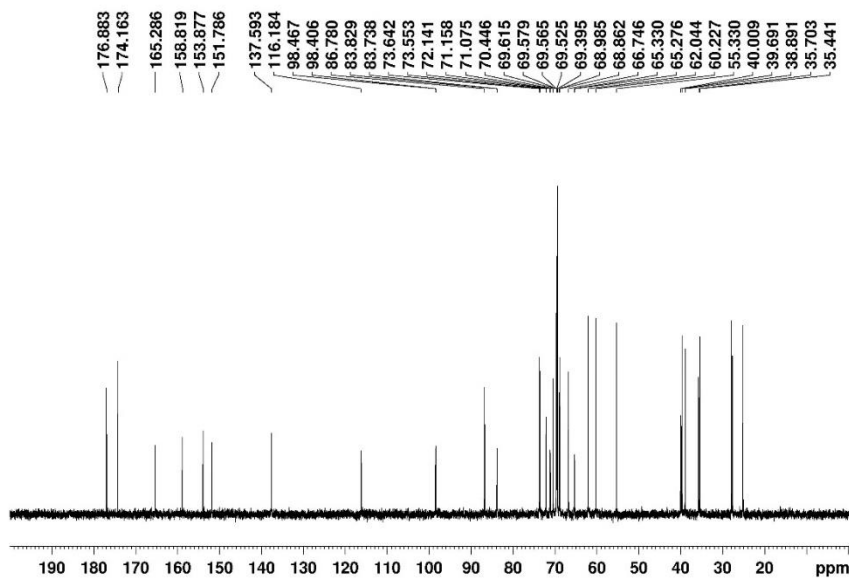

## 2. Synthesis of GDP-Fuc-AM- BCN

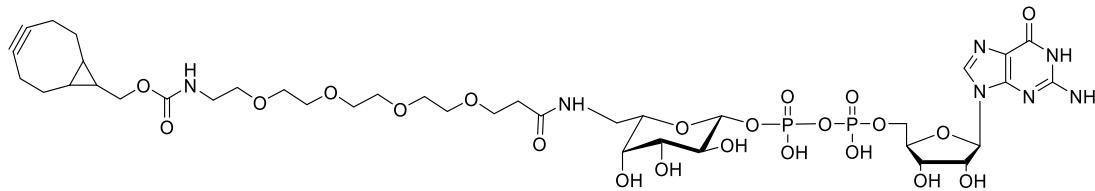

200  $\mu\text{L}$  GDP-Fuc-AM (100 mM) in 600  $\mu\text{L}$  ddH<sub>2</sub>O were added with 200  $\mu\text{L}$  NaHCO<sub>3</sub> (200 mM), 560  $\mu\text{L}$  THF and 440  $\mu\text{L}$  NHS-PEG<sub>4</sub>-BCN (Xi'an Dianhua Biotechnology Co.,Ltd) (50 mM in THF). The reaction was stirred at rt for 4 h and monitored by TLC. The solvent was removed under reduced pressure. The crude product was further purified through a Prep-HPLC system to give the product as a white solid (7.4 mg, yield 36%). HRMS (ESI-) calcd for C<sub>38</sub>H<sub>59</sub>N<sub>7</sub>O<sub>22</sub>P<sub>2</sub> (M-2H<sup>+</sup>)/2 512.6522, found 512.6532. <sup>1</sup>H NMR (400 MHz, D<sub>2</sub>O)  $\delta$  8.17 (s, 1H), 5.92 (d, *J* = 5.9 Hz, 1H), 4.93 (t, *J* = 7.8 Hz, 1H), 4.78-4.75 (m, 1H), 4.52 (dd, *J* = 5.1, 3.5 Hz, 1H), 4.36-4.32 (m, 1H), 4.22 (dd, *J* = 5.4, 3.4 Hz, 2H), 4.14 (d, *J* = 8.2 Hz, 2H), 3.86 (d, *J* = 2.3 Hz, 1H), 3.75 (t, *J* = 6.3 Hz, 2H), 3.69-3.64 (m, 14H), 3.62-3.58 (m, 4H), 3.31 (t, *J* = 5.3 Hz, 2H), 3.29-3.26 (m, 1H), 2.55 (t, *J* = 6.2 Hz, 2H), 2.29-2.15 (m, 6H), 1.54-1.51 (m, 2H), 1.39-1.31 (m, 1H), 0.92 (t, *J* = 9.8 Hz, 2H). <sup>13</sup>C NMR (100 MHz, CDCl<sub>3</sub>): 174.15, 158.76, 158.56, 153.97, 151.61, 137.43, 115.69, 100.18, 98.47, 98.40, 87.0, 83.79, 83.70, 78.73, 73.56, 72.14, 71.16, 71.08, 70.35, 69.58, 69.52, 69.42, 69.40, 69.33, 68.98, 66.74, 65.25, 65.19, 63.72, 40.0, 35.70, 20.70, 19.69, 17.14

### Mass spectrometry

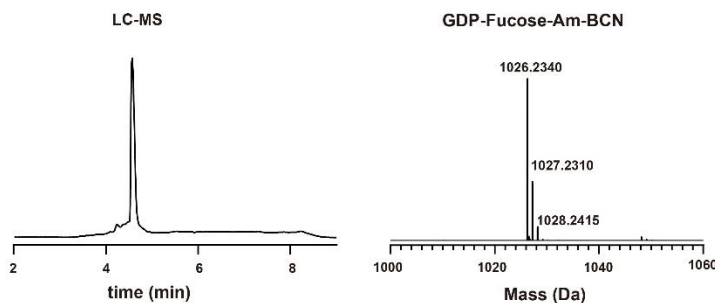

### <sup>1</sup>H NMR (400 MHz, D<sub>2</sub>O)

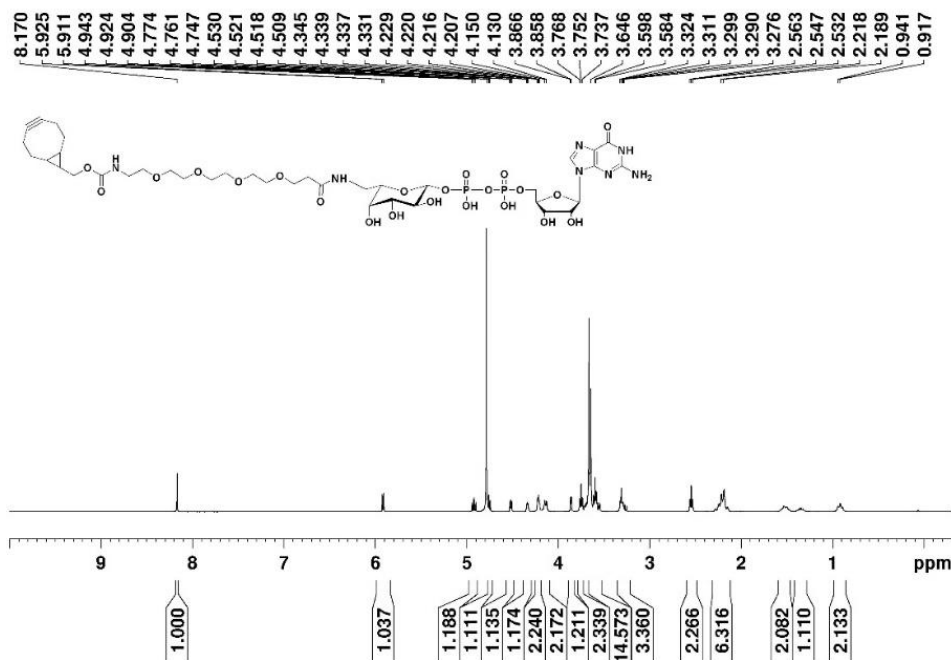

$^{13}\text{C}$  NMR (100 MHz,  $\text{CDCl}_3$ )

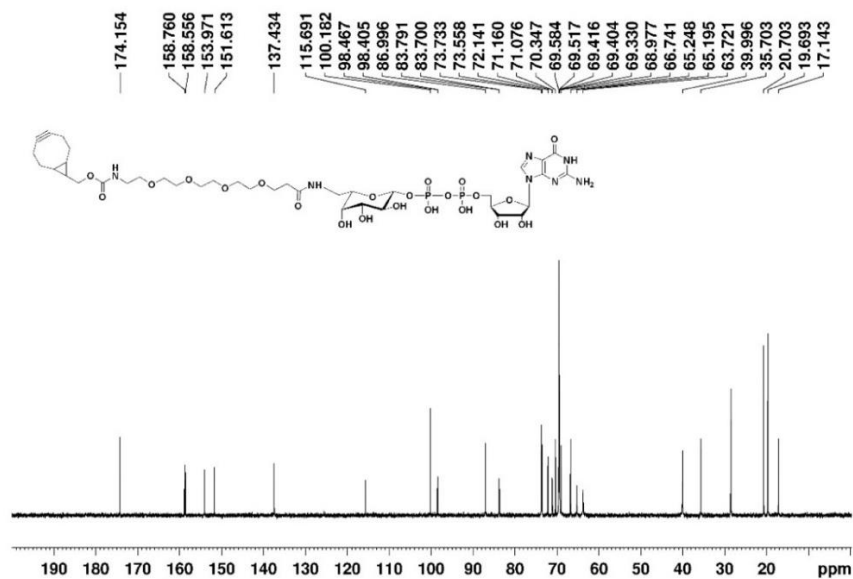

Supplement: sciadv.add2337_sm.pdf [file sciadv.add2337_sm.pdf]
